# Supplementary material for: A modified graphitic carbon nitride (MCN)/Fe3O4 composite as a super electromagnetic wave absorber
Source: Royal Society of Chemistry journal article supplement (doi:10.1039/d1ta06711g), 2021-01-01
Supplement: d1ta06711g1.pdf [file d1ta06711g1.pdf]

## Modified Graphitic Carbon Nitride (MCN)/Fe<sub>3</sub>O<sub>4</sub> Composite as a Super Electromagnetic Wave Absorber

*Xiaoyu Zhu,<sup>a</sup> Hongfang Qiu,<sup>a</sup> Ping Chen<sup>a,b</sup>*

a. State Key Laboratory of Fine Chemicals and School of Chemical Engineering, Dalian University of Technology, Dalian (116024), China

b. Key Laboratory of Materials Modification by Laser, Ion and Electron Beams (Dalian University of Technology), Ministry of Education, Dalian (116024), China.

E-Mail: chenping\_898@126.com

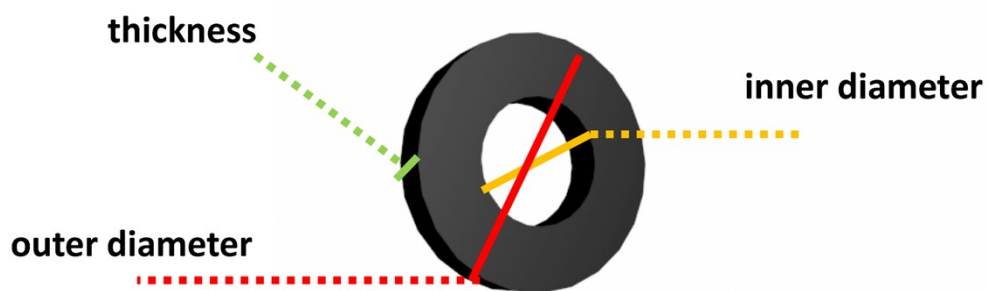

Fig. S1 The schematic diagram of concentric ring model

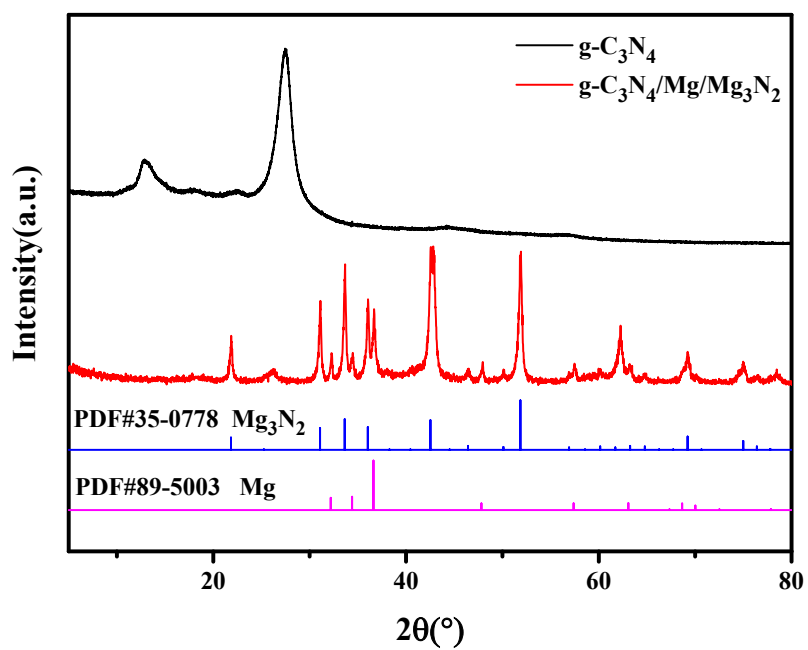

Fig. S2 The XRD of  $g\text{-C}_3\text{N}_4$  and  $\text{MCN}/\text{Mg}/\text{Mg}_3\text{N}_2$

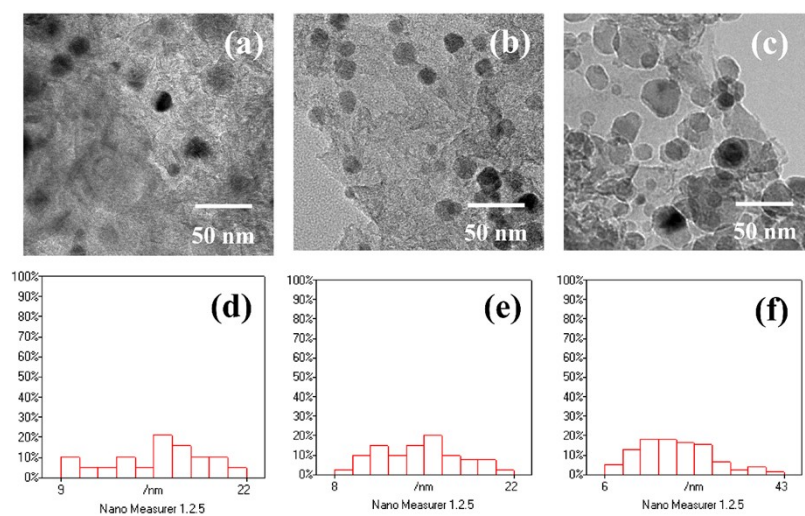

Fig. S3 The TEM of (a) MCN/Fe<sub>3</sub>O<sub>4</sub>-300, (b) MCN/Fe<sub>3</sub>O<sub>4</sub>-500, (c) MCN/Fe<sub>3</sub>O<sub>4</sub>-700, and size distribution of (d) MCN/Fe<sub>3</sub>O<sub>4</sub>-300, (e) MCN/Fe<sub>3</sub>O<sub>4</sub>-500, and (f) MCN/Fe<sub>3</sub>O<sub>4</sub>-700

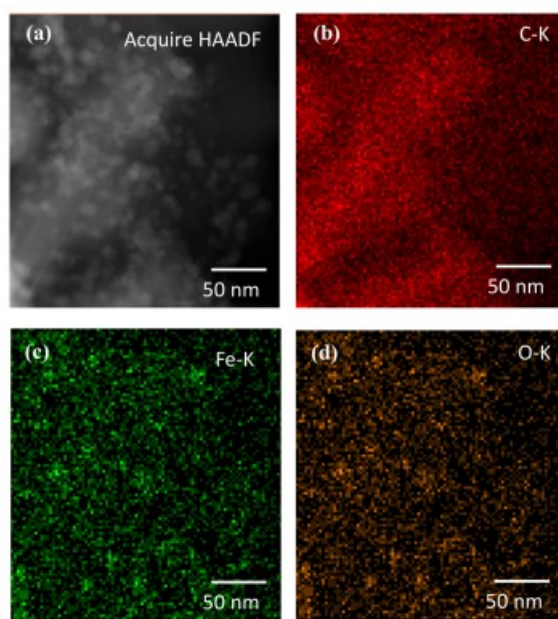

Fig. S4 The TEM and EDS mapping of MCN/Fe<sub>3</sub>O<sub>4</sub>-500

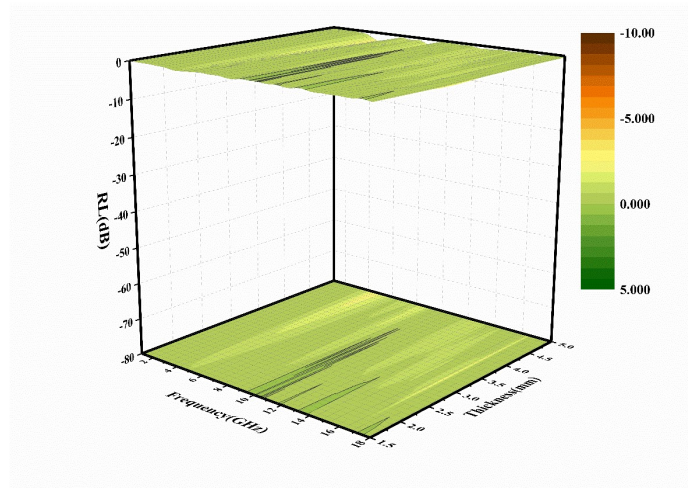

Fig. S5 RL curve of g-C<sub>3</sub>N<sub>4</sub>

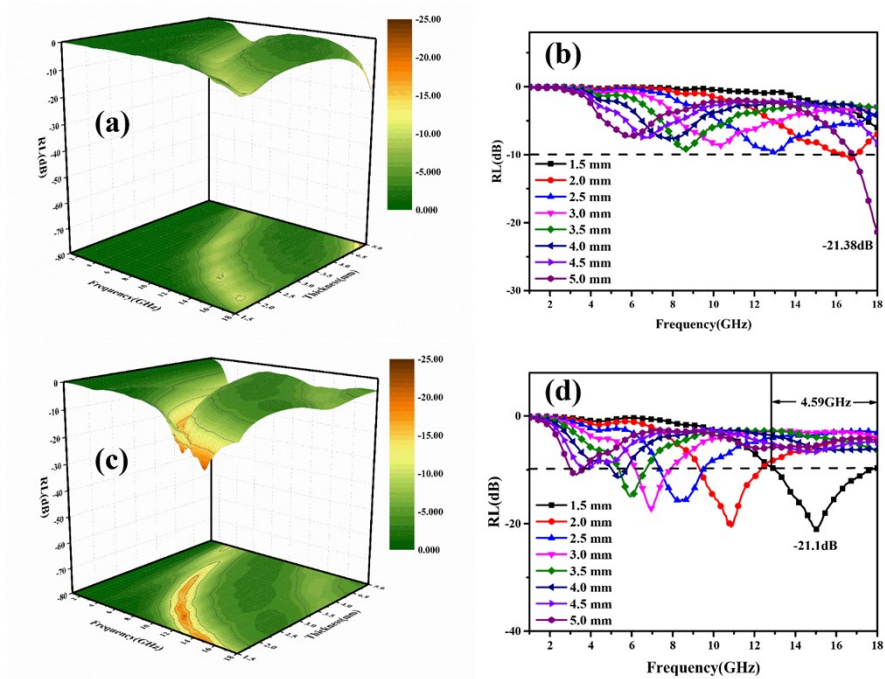

Fig. S6 RL curves of (a) and (b) MCN/Fe<sub>3</sub>O<sub>4</sub>-500 (mass ratio of MCN/Fe(acac)<sub>3</sub>=1/1), (c) and (d) MCN/Fe<sub>3</sub>O<sub>4</sub>-500 (mass ratio of MCN/Fe(acac)<sub>3</sub>=5/1)

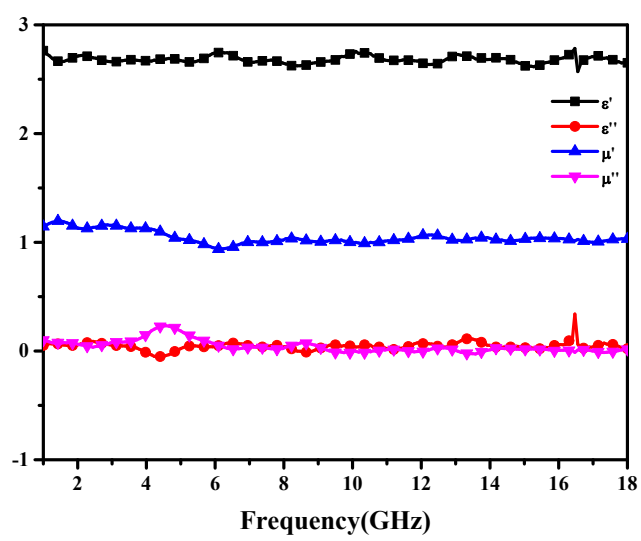

Fig. S7  $\epsilon'$ ,  $\epsilon''$ ,  $\mu'$ ,  $\mu''$ -f curves of g-C<sub>3</sub>N<sub>4</sub>
